# Supplementary material
Source: ML conference proceedings conference paper supplement (https://openreview.net/forum?id=HYaUHZAoPc)
Supplement: supplementary_material [file attachment]

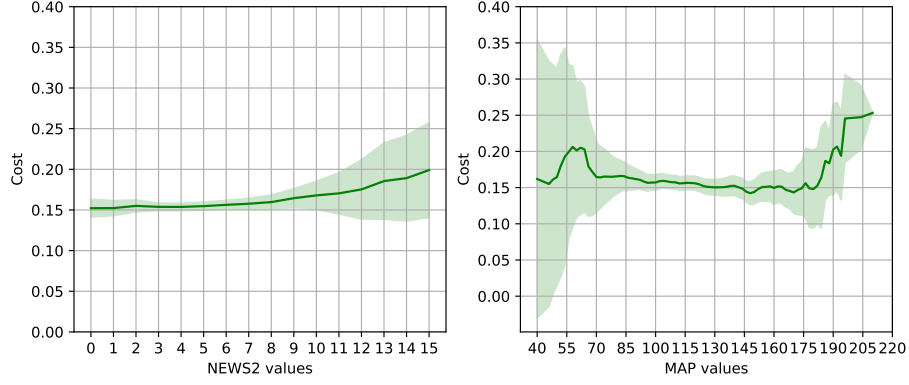

Figure 1: The relationship between the NEWS2 and MAP indicators with cost values.

Table 1: Comparison across policies on the sepsis test set using NEWS2 reward. The best algorithms are highlighted in red.  $RMSE_{IV}$  and  $RMSE_{VASO}$  mean the RMSE loss for the IV fluid treatment and vasopressor treatment. P.F1 and S.F1 denote the patient-wise F1 and sample-wise F1.

| Metric        | DQN                                | CQL                               | IQL                               | BCQ              | CDT+CT<br>(without attention) | CDT+CT                              |
|---------------|------------------------------------|-----------------------------------|-----------------------------------|------------------|-------------------------------|-------------------------------------|
| $RMSE_{IV}$   | $638.51 \pm 8.63$                  | $541.67 \pm 5.74$                 | $578.96 \pm 10.06$                | $626.2 \pm 9.56$ | $435.89 \pm 9.60$             | <b><math>433.55 \pm 7.20</math></b> |
| $RMSE_{VASO}$ | $0.44 \pm 0.07$                    | <b><math>0.30 \pm 0.01</math></b> | $0.31 \pm 0.01$                   | 0.31             | 1.14                          | $1.13 \pm 0.01$                     |
| WIS           | $-3.79 \pm 0.01$                   | $-4.10 \pm 1.43$                  | -5.83                             | -4.58            | $-5.38 \pm 2.13$              | <b><math>-3.51 \pm 0.11</math></b>  |
| $WIS_b$       | $-3.88 \pm 0.73$                   | $-4.48 \pm 0.77$                  | -5.310.06                         | $-5.41 \pm 0.17$ | $-5.37 \pm 1.73$              | <b><math>-3.52 \pm 0.17</math></b>  |
| $WIS_t$       | $-3.84 \pm 0.11$                   | $-4.10 \pm 1.43$                  | -5.83                             | -4.58            | $-5.75 \pm 2.13$              | <b><math>-3.51 \pm 0.11</math></b>  |
| $WIS_{bt}$    | $-3.87 \pm 0.67$                   | $-4.38 \pm 0.98$                  | $-5.27 \pm 0.05$                  | $-5.55 \pm 0.19$ | $-5.27 \pm 1.72$              | <b><math>-3.52 \pm 0.17</math></b>  |
| DR            | <b><math>-0.14 \pm 0.04</math></b> | $-0.71 \pm 0.05$                  | $-0.51 \pm 0.04$                  | $-1.54 \pm 0.01$ | $-3.40 \pm 0.36$              | -3.08                               |
| P.F1          | $0.06 \pm 0.02$                    | $0.33 \pm 0.01$                   | <b><math>0.34 \pm 0.01</math></b> | $0.23 \pm 0.01$  | $0.19 \pm 0.04$               | $0.17 \pm 0.02$                     |
| S.F1          | $0.06 \pm 0.02$                    | $0.32 \pm 0.01$                   | <b><math>0.33 \pm 0.01</math></b> | $0.22 \pm 0.01$  | $0.18 \pm 0.04$               | $0.16 \pm 0.02$                     |

Table 2: The impact of generative world models with different target rewards on policy estimation.

| Target Reward | IV DIFF          | VASO DIFF        | ACTION DIFF      |
|---------------|------------------|------------------|------------------|
| 1             | $51.60 \pm 1.78$ | $58.8 \pm 2.74$  | $54.25 \pm 1.79$ |
| 5             | $52.50 \pm 1.46$ | $58.84 \pm 3.24$ | $54.45 \pm 1.65$ |
| 10            | $52.25 \pm 1.33$ | $56.85 \pm 4.20$ | $55.00 \pm 1.80$ |
| 40            | $52.05 \pm 1.30$ | $56.75 \pm 3.13$ | $55.80 \pm 1.76$ |
| 50            | $52.00 \pm 1.31$ | $57.35 \pm 2.09$ | $55.05 \pm 1.93$ |
